# Supplementary material for: Genetic Footprints of Iberian Cattle in America 500 Years after the Arrival of Columbus
Source: PubMed Central journal article supplement (PMC3498335; doi:10.1371/journal.pone.0049066), 2012-11-14
Supplement: pone.0049066.s003.pdf [file pone.0049066.s003.pdf]

| <b>Breed name</b>          | <b>Acron.</b> | <b>N</b> | <b>Sample type</b>   | <b>Breed type</b> | <b>GG</b> | <b>Sample origin</b> | <b>Reg</b> |
|----------------------------|---------------|----------|----------------------|-------------------|-----------|----------------------|------------|
| Criollo Argentino          | CARG          | 50       | Hair roots           | Creole            | Taurine   | Argentina            | SA         |
| Criollo Patagónico         | PAT           | 35       | Hair roots           | Creole            | Taurine   | Argentina            | SA         |
| Caracú                     | CAR           | 47       | Hair roots           | Creole            | Taurine   | Brasil               | SA         |
| Blanco Orejinegro          | BON           | 25       | Blood                | Creole            | Taurine   | Colombia             | SA         |
| Caqueteño                  | CAQ           | 25       | Blood                | Creole            | Taurine   | Colombia             | SA         |
| Criollo Casanareño         | CC            | 35       | Blood                | Creole            | Taurine   | Colombia             | SA         |
| Chino Santandereano        | CH            | 25       | Blood                | Creole            | Taurine   | Colombia             | SA         |
| Costeño con Cuernos        | CCC           | 25       | Blood                | Creole            | Taurine   | Colombia             | SA         |
| Hartón del Valle           | HV            | 22       | Blood                | Creole            | Taurine   | Colombia             | SA         |
| Lucerna                    | LUC           | 24       | Blood                | Creole            | Taurine   | Colombia             | SA         |
| Romosinuano                | RMS           | 25       | Blood                | Creole            | Taurine   | Colombia             | SA         |
| Sanmartinero               | SM            | 25       | Blood                | Creole            | Taurine   | Colombia             | SA         |
| Velasquez                  | VEL           | 25       | Blood                | Creole            | Taurine   | Colombia             | SA         |
| Cubano                     | CUB           | 50       | Blood                | Creole            | Taurine   | Cuba                 | CI         |
| Siboney                    | SIB           | 50       | Blood                | Creole            | Taurine   | Cuba                 | CI         |
| Criollo Ecuatoriano        | EC            | 12       | Hair roots           | Creole            | Taurine   | Ecuador              | SA         |
| Criollo de Baja California | CBC           | 21       | Hair roots           | Creole            | Taurine   | México               | NA         |
| Criollo de Chiapas         | CHI           | 30       | Hair roots           | Creole            | Taurine   | México               | NA         |
| Criollo de Chihuahua       | CHU           | 19       | Hair roots           | Creole            | Taurine   | México               | NA         |
| Criollo de Nayarit         | CNY           | 24       | Hair roots           | Creole            | Taurine   | México               | NA         |
| Criollo Poblano            | CPO           | 43       | Hair roots           | Creole            | Taurine   | México               | NA         |
| Guabalá                    | GUA           | 25       | Hair roots           | Creole            | Taurine   | Panama               | CA         |
| Guaymí                     | GY            | 36       | Hair roots           | Creole            | Taurine   | Panama               | CA         |
| Pampa Chaqueño             | PA            | 50       | Hair roots           | Creole            | Taurine   | Paraguay             | SA         |
| Criollo Pilcomayo          | PIL           | 36       | Hair roots           | Creole            | Taurine   | Paraguay             | SA         |
| Criollo Uruguayo           | CUR           | 43       | Blood                | Creole            | Taurine   | Uruguay              | SA         |
| Texas Longhorn             | TLH           | 80       | Hair roots,<br>Semen | Creole            | Taurine   | USA                  | NA         |

|                           |      |    |            |        |         |                         |    |
|---------------------------|------|----|------------|--------|---------|-------------------------|----|
| Alistana                  | ALS  | 50 | Blood      | Native | Taurine | Spain                   | IB |
| Asturiana de las Montañas | ASM  | 50 | Blood      | Native | Taurine | Spain                   | IB |
| Asturiana de los Valles   | ASV  | 50 | Blood      | Native | Taurine | Spain                   | IB |
| Avileña                   | AVI  | 50 | Blood      | Native | Taurine | Spain                   | IB |
| Berrenda en Colorado      | BC   | 40 | Blood      | Native | Taurine | Spain                   | IB |
| Berrenda en Negro         | BN   | 30 | Blood      | Native | Taurine | Spain                   | IB |
| Betizu                    | BET  | 20 | Blood      | Native | Taurine | Spain                   | IB |
| Bruna de los Pirineos     | BRP  | 50 | Blood      | Native | Taurine | Spain                   | IB |
| Mallorquina               | MALL | 50 | Blood      | Native | Taurine | Spain, Balearic Islands | IB |
| Menorquina                | MEN  | 50 | Blood      | Native | Taurine | Spain, Balearic Islands | IB |
| Monchina                  | MON  | 50 | Blood      | Native | Taurine | Spain                   | IB |
| Morucha                   | MOR  | 50 | Blood      | Native | Taurine | Spain                   | IB |
| Marismeña                 | MAR  | 50 | Blood      | Native | Taurine | Spain                   | IB |
| Negra Andaluza            | NAN  | 21 | Hair roots | Native | Taurine | Spain                   | IB |
| Pajuna                    | PAJ  | 38 | Blood      | Native | Taurine | Spain                   | IB |
| Parde de Montaña          | PM   | 50 | Blood      | Native | Taurine | Spain                   | IB |
| Pasiega                   | PAS  | 50 | Blood      | Native | Taurine | Spain                   | IB |
| Pirenaica                 | PIRM | 50 | Blood      | Native | Taurine | Spain                   | IB |
| Retinta                   | RET  | 50 | Hair roots | Native | Taurine | Spain                   | IB |
| Rubia Gallega             | RGA  | 50 | Hair roots | Native | Taurine | Spain                   | IB |
| Sayaguesa                 | SAY  | 50 | Blood      | Native | Taurine | Spain                   | IB |
| Serrana de Teruel         | STE  | 50 | Blood      | Native | Taurine | Spain                   | IB |
| Toro de Lidia             | TL   | 50 | Blood      | Native | Taurine | Spain                   | IB |
| Tudanca                   | TUD  | 50 | Blood      | Native | Taurine | Spain                   | IB |
| Vaca Canaria              | VCA  | 50 | Blood      | Native | Taurine | Spain, Canary Islands   | IB |
| Vaca Palmera              | PAL  | 50 | Blood      | Native | Taurine | Spain, Canary Islands   | IB |
| Alentejana                | ALT  | 38 | Blood      | Native | Taurine | Portugal                | IB |
| Arouquesa                 | ARO  | 70 | Blood      | Native | Taurine | Portugal                | IB |

|                |      |    |                      |            |          |                           |    |
|----------------|------|----|----------------------|------------|----------|---------------------------|----|
| Barrosã        | BARR | 69 | Blood                | Native     | Taurine  | Portugal                  | IB |
| Brava de Lide  | BRAV | 43 | Blood                | Native     | Taurine  | Portugal                  | IB |
| Cachena        | CACH | 51 | Blood                | Native     | Taurine  | Portugal                  | IB |
| Garvonesa      | GARV | 39 | Blood                | Native     | Taurine  | Portugal                  | IB |
| Marinhoa       | MARI | 46 | Blood                | Native     | Taurine  | Portugal                  | IB |
| Maronesa       | MARO | 47 | Blood                | Native     | Taurine  | Portugal                  | IB |
| Mertolenga     | MERT | 64 | Blood                | Native     | Taurine  | Portugal                  | IB |
| Minhota        | MINH | 50 | Blood                | Native     | Taurine  | Portugal                  | IB |
| Mirandesa      | MIRA | 54 | Blood                | Native     | Taurine  | Portugal                  | IB |
| Preta          | PRET | 60 | Blood                | Native     | Taurine  | Portugal                  | IB |
| Ramo Grande    | RG   | 44 | Blood                | Native     | Taurine  | Portugal, Azores Islands  | IB |
| Aberdeen Angus | AA   | 62 | Hair roots,<br>Semen | Commercial | Taurine  | Argentina; USA            | BI |
| British White  | BWC  | 19 | Hair roots,<br>Semen | Native     | Taurine  | USA                       | BI |
| Hereford       | HER  | 88 | Hair roots,<br>Semen | Commercial | Taurine  | Argentina,<br>México, USA | BI |
| Jersey         | JER  | 20 | Hair roots,<br>Semen | Commercial | Taurine  | USA                       | BI |
| Shorthorn      | SH   | 11 | Hair roots,<br>Semen | Commercial | Taurine  | USA                       | BI |
| Charolais      | CHAR | 58 | Blood                | Commercial | Taurine  | Portugal                  | CE |
| Friesian       | FRI  | 50 | Blood                | Commercial | Taurine  | Portugal                  | CE |
| Limousin       | LIM  | 47 | Hair roots           | Commercial | Taurine  | Portugal                  | CE |
| Brown Swiss    | BSW  | 29 | Hair roots           | Commercial | Taurine  | México                    | CE |
| Brahman        | BRH  | 41 | Hair roots,<br>Semen | Commercial | Indicine | México, USA               | IN |
| Gyr            | GYR  | 23 | Blood                | Commercial | Indicine | Brazil                    | IN |
| Guzerat        | GUZ  | 15 | Hair roots           | Commercial | Indicine | Brazil                    | IN |
| Nelore         | NEL  | 28 | Hair roots           | Commercial | Indicine | Brazil                    | IN |
| Sindi          | SIN  | 11 | Hair roots           | Commercial | Indicine | Brazil                    | IN |
| Zebu Cubano    | CUZ  | 50 | Blood                | Commercial | Indicine | Cuba                      | IN |
