# Supplementary material for: Genetic Footprints of Iberian Cattle in America 500 Years after the Arrival of Columbus
Source: PubMed Central journal article supplement (PMC3498335; doi:10.1371/journal.pone.0049066), 2012-11-14
Supplement: pone.0049066.s004.pdf [file pone.0049066.s004.pdf]

| <b>BREED</b>   | <b>N</b> | <b>Am (SD)</b> | <b>Ae</b> | <b>Ar</b> | <b>Ho (SD)</b> | <b>He (SD)</b> | <b>Fis (CI)</b>        |
|----------------|----------|----------------|-----------|-----------|----------------|----------------|------------------------|
| <b>Creole</b>  |          |                |           |           |                |                |                        |
| CARG           | 50       | 6.26 (1.66)    | 3.326     | 4.003     | 0.673 (0.015)  | 0.678 (0.023)  | 0.007 (-0.049/0.041)   |
| PAT            | 35       | 5.32 (1.57)    | 3.224     | 3.841     | 0.629 (0.019)  | 0.670 (0.025)  | 0.062 (-0.012/0.104)   |
| CAR            | 47       | 6.74 (1.73)    | 3.695     | 4.321     | 0.733 (0.015)  | 0.711 (0.022)  | -0.030 (-0.080/-0.006) |
| BON            | 25       | 5.74 (1.76)    | 3.391     | 4.100     | 0.737 (0.020)  | 0.697 (0.023)  | -0.059 (-0.138/-0.027) |
| CAQ            | 25       | 7.58 (1.57)    | 4.778     | 5.220     | 0.780 (0.019)  | 0.787 (0.017)  | 0.009 (-0.070/0.040)   |
| SM             | 25       | 6.37 (1.16)    | 3.597     | 4.391     | 0.692 (0.022)  | 0.721 (0.018)  | 0.042 (-0.046/0.076)   |
| RMS            | 25       | 5.11 (1.59)    | 3.212     | 3.941     | 0.651 (0.023)  | 0.669 (0.030)  | 0.028 (-0.066/0.071)   |
| CCC            | 25       | 5.26 (1.37)    | 3.288     | 3.941     | 0.692 (0.022)  | 0.671 (0.031)  | -0.032 (-0.120/0.007)  |
| CH             | 25       | 7.32 (1.73)    | 4.377     | 5.028     | 0.726 (0.021)  | 0.776 (0.013)  | 0.066 (-0.004/0.089)   |
| VEL            | 25       | 6.79 (1.44)    | 4.307     | 4.918     | 0.730 (0.021)  | 0.769 (0.016)  | 0.053 (-0.033/0.086)   |
| LUC            | 24       | 6.63 (2.06)    | 3.820     | 4.688     | 0.673 (0.024)  | 0.717 (0.025)  | 0.063 (-0.027/0.092)   |
| HV             | 22       | 7.74 (1.73)    | 4.600     | 5.238     | 0.783 (0.021)  | 0.783 (0.016)  | -0.001 (-0.0867/0.035) |
| CC             | 35       | 8.00 (1.65)    | 3.524     | 4.125     | 0.739 (0.019)  | 0.766 (0.020)  | 0.035 (-0.022/0.060)   |
| CUB            | 50       | 7.58 (2.36)    | 4.614     | 4.920     | 0.793 (0.013)  | 0.761 (0.018)  | -0.043 (-0.084/-0.024) |
| SIB            | 50       | 8.05 (2.30)    | 4.728     | 5.051     | 0.746 (0.014)  | 0.762 (0.027)  | 0.022 (-0.027/0.049)   |
| EC             | 12       | 6.63 (2.11)    | 4.299     | 5.233     | 0.732 (0.029)  | 0.771 (0.023)  | 0.054 (-0.074/0.076)   |
| CPO            | 43       | 8.37 (2.01)    | 4.672     | 5.075     | 0.693 (0.016)  | 0.774 (0.017)  | 0.105 (0.052/0.133)    |
| CBC            | 21       | 7.05 (1.58)    | 4.183     | 4.983     | 0.742 (0.024)  | 0.760 (0.019)  | 0.025 (-0.071/0.048)   |
| CHU            | 19       | 6.68 (1.49)    | 4.333     | 5.140     | 0.719 (0.026)  | 0.777 (0.018)  | 0.077 (-0.027/0.105)   |
| CNY            | 24       | 7.74 (1.94)    | 4.718     | 5.248     | 0.749 (0.021)  | 0.788 (0.018)  | 0.050 (-0.019/0.066)   |
| CHI            | 30       | 7.84 (1.57)    | 4.768     | 5.234     | 0.741 (0.019)  | 0.782 (0.021)  | 0.053 (-0.013/0.082)   |
| GUA            | 25       | 5.79 (1.96)    | 3.531     | 4.104     | 0.629 (0.022)  | 0.660 (0.045)  | 0.048 (-0.047/0.093)   |
| GY             | 36       | 7.79 (1.65)    | 4.263     | 4.925     | 0.735 (0.017)  | 0.756 (0.017)  | 0.028 (-0.031/0.053)   |
| PA             | 50       | 8.11 (1.79)    | 4.624     | 5.050     | 0.750 (0.014)  | 0.771 (0.017)  | 0.028 (-0.015/0.051)   |
| PIL            | 36       | 7.53 (1.74)    | 4.682     | 5.071     | 0.764 (0.016)  | 0.768 (0.022)  | 0.006 (-0.043/0.023)   |
| CUR            | 43       | 5.63 (1.67)    | 3.222     | 3.974     | 0.668 (0.017)  | 0.674 (0.019)  | 0.009 (-0.046/0.035)   |
| TLH            | 80       | 8.05 (2.46)    | 4.390     | 4.784     | 0.707 (0.012)  | 0.740 (0.025)  | 0.045 (0.010/0.067)    |
| <b>Spanish</b> |          |                |           |           |                |                |                        |
| ALS            | 50       | 7.37 (1.67)    | 3.777     | 4.406     | 0.664 (0.015)  | 0.711 (0.025)  | 0.068 (0.012/0.102)    |
| ASM            | 50       | 7.16 (2.22)    | 3.985     | 4.569     | 0.674 (0.015)  | 0.723 (0.025)  | 0.069 (0.018/0.101)    |
| ASV            | 50       | 8.63 (2.17)    | 4.618     | 5.069     | 0.728 (0.014)  | 0.754 (0.024)  | 0.034 (-0.012/0.058)   |
| AVI            | 50       | 7.37 (2.43)    | 4.220     | 4.701     | 0.688 (0.015)  | 0.731 (0.028)  | 0.060 (0.014/0.087)    |

|                   |    |             |       |       |               |               |                        |
|-------------------|----|-------------|-------|-------|---------------|---------------|------------------------|
| BC                | 40 | 7.68 (2.16) | 4.731 | 5.109 | 0.731 (0.016) | 0.779 (0.016) | 0.063 (0.005/0.098)    |
| BN                | 30 | 5.21 (1.55) | 2.966 | 3.800 | 0.595 (0.021) | 0.635 (0.028) | 0.064 (-0.022/0.105)   |
| BET               | 20 | 5.68 (1.45) | 3.703 | 4.424 | 0.665 (0.026) | 0.730 (0.019) | 0.092 (-0.041/0.159)   |
| BRP               | 50 | 7.53 (2.09) | 3.782 | 4.458 | 0.687 (0.015) | 0.697 (0.030) | 0.014 (-0.033/0.040)   |
| MALL              | 50 | 4.37 (1.54) | 2.645 | 3.171 | 0.542 (0.016) | 0.577 (0.045) | 0.061 (0.001/0.099)    |
| MAR               | 50 | 5.42 (1.39) | 2.703 | 3.573 | 0.602 (0.016) | 0.608 (0.027) | 0.010 (-0.042/0.040)   |
| MEN               | 50 | 5.84 (1.98) | 3.005 | 3.782 | 0.636 (0.016) | 0.628 (0.031) | -0.013 (-0.071/0.024)  |
| MON               | 50 | 8.11 (2.28) | 4.330 | 4.882 | 0.732 (0.014) | 0.751 (0.020) | 0.026 (-0.025/0.057)   |
| MOR               | 50 | 7.74 (1.76) | 4.293 | 4.810 | 0.704 (0.015) | 0.754 (0.020) | 0.067 (0.025/0.088)    |
| NA                | 21 | 6.16 (2.14) | 3.685 | 4.454 | 0.634 (0.025) | 0.708 (0.027) | 0.107 (-0.003/0.146)   |
| PAJ               | 38 | 7.37 (2.17) | 4.156 | 4.691 | 0.711 (0.017) | 0.741 (0.022) | 0.042 (-0.015/0.073)   |
| PM                | 50 | 7.47 (1.81) | 3.679 | 4.488 | 0.700 (0.015) | 0.710 (0.020) | 0.014 (-0.032/0.038)   |
| PAS               | 50 | 7.53 (2.20) | 4.024 | 4.669 | 0.686 (0.015) | 0.721 (0.026) | 0.049 (0.002/0.075)    |
| PIRM              | 50 | 7.16 (2.06) | 3.883 | 4.566 | 0.704 (0.015) | 0.725 (0.019) | 0.029 (-0.017/0.055)   |
| RET               | 50 | 7.53 (2.61) | 4.472 | 4.834 | 0.736 (0.014) | 0.758 (0.022) | 0.031 (-0.019/0.059)   |
| RGA               | 50 | 7.47 (1.95) | 3.977 | 4.566 | 0.696 (0.015) | 0.713 (0.032) | 0.024 (-0.017/0.043)   |
| SAY               | 50 | 7.32 (1.60) | 4.177 | 4.733 | 0.686 (0.015) | 0.743 (0.022) | 0.078 (0.025/0.111)    |
| STE               | 50 | 7.95 (1.99) | 4.559 | 4.943 | 0.727 (0.014) | 0.762 (0.021) | 0.045 (-0.001/0.071)   |
| TL                | 50 | 6.32 (2.11) | 3.286 | 4.029 | 0.587 (0.017) | 0.651 (0.034) | 0.099 (0.040/0.135)    |
| TUD               | 50 | 7.16 (2.34) | 3.947 | 4.502 | 0.659 (0.015) | 0.696 (0.030) | 0.054 (0.011/0.078)    |
| VCA               | 50 | 8.00 (2.29) | 4.463 | 4.923 | 0.729 (0.015) | 0.768 (0.016) | 0.052 (0.005/0.076)    |
| PAL               | 50 | 5.58 (1.84) | 3.111 | 3.757 | 0.633 (0.016) | 0.626 (0.040) | -0.011 (-0.058/0.017)  |
| <b>Portuguese</b> |    |             |       |       |               |               |                        |
| ALT               | 38 | 5.79 (1.32) | 3.377 | 4.084 | 0.648 (0.018) | 0.688 (0.024) | 0.059 (0.001/0.091)    |
| ARO               | 70 | 8.05 (2.61) | 4.328 | 4.779 | 0.717 (0.012) | 0.745 (0.024) | 0.038 (-0.004/0.065)   |
| BARR              | 69 | 6.53 (1.71) | 3.691 | 4.265 | 0.697 (0.013) | 0.696 (0.034) | -0.001 (-0.043/0.028)  |
| BRAV              | 43 | 5.47 (1.81) | 3.098 | 3.709 | 0.565 (0.017) | 0.631 (0.037) | 0.107 (0.042/0.148)    |
| CACH              | 51 | 7.68 (1.95) | 4.172 | 4.689 | 0.728 (0.014) | 0.727 (0.034) | -0.001 (-0.043/0.021)  |
| GARV              | 39 | 6.16 (1.89) | 3.234 | 3.968 | 0.677 (0.017) | 0.651 (0.034) | -0.041 (-0.096/-0.014) |
| MARI              | 46 | 6.11 (1.73) | 3.548 | 4.153 | 0.689 (0.016) | 0.692 (0.029) | 0.005 (-0.046/0.034)   |
| MARO              | 47 | 6.68 (1.63) | 3.548 | 4.276 | 0.685 (0.016) | 0.693 (0.027) | 0.012 (-0.037/0.040)   |
| MERT              | 64 | 7.74 (2.45) | 4.006 | 4.593 | 0.641 (0.014) | 0.722 (0.028) | 0.113 (0.066/0.145)    |
| MINH              | 50 | 7.68 (2.24) | 3.898 | 4.635 | 0.767 (0.014) | 0.725 (0.024) | -0.059 (-0.099/-0.039) |
| MIRA              | 54 | 5.63 (1.07) | 2.813 | 3.546 | 0.615 (0.015) | 0.623 (0.026) | 0.012 (-0.041/0.046)   |

|                             |       |             |       |       |               |               |                        |
|-----------------------------|-------|-------------|-------|-------|---------------|---------------|------------------------|
| PRET                        | 60    | 7.05 (2.61) | 3.550 | 4.256 | 0.653 (0.014) | 0.674 (0.036) | 0.032 (-0.017/0.065)   |
| RG                          | 44    | 7.53 (2.39) | 3.852 | 4.567 | 0.688 (0.016) | 0.721 (0.023) | 0.045 (-0.014/0.086)   |
| <b>Continental European</b> |       |             |       |       |               |               |                        |
| FRI                         | 50    | 6.89 (2.40) | 3.920 | 4.512 | 0.732 (0.015) | 0.714 (0.025) | -0.025 (-0.075/0.005)  |
| SPA                         | 29    | 6.79 (2.15) | 3.860 | 4.425 | 0.739 (0.019) | 0.726 (0.024) | -0.018 (-0.088/0.011)  |
| CHAR                        | 58    | 6.95 (1.99) | 3.904 | 3.896 | 0.682 (0.014) | 0.705 (0.032) | 0.033 (-0.012/0.062)   |
| LIM                         | 47    | 6.95 (1.99) | 4.111 | 3.696 | 0.740 (0.015) | 0.743 (0.018) | 0.004 (-0.041/0.029)   |
| <b>British</b>              |       |             |       |       |               |               |                        |
| AA                          | 62    | 6.26 (1.88) | 3.510 | 4.447 | 0.633 (0.014) | 0.682 (0.034) | 0.072 (0.025/0.101)    |
| BWC                         | 19    | 5.00 (1.29) | 3.242 | 4.137 | 0.667 (0.026) | 0.676 (0.028) | 0.013 (-0.139/0.106)   |
| HER                         | 88    | 6.63 (1.54) | 3.556 | 4.735 | 0.655 (0.012) | 0.704 (0.018) | 0.070 (0.033/0.095)    |
| JER                         | 20    | 4.79 (1.03) | 2.906 | 4.611 | 0.666 (0.024) | 0.648 (0.026) | -0.029 (-0.124/0.011)  |
| SH                          | 11    | 5.16 (1.98) | 3.067 | 4.120 | 0.690 (0.032) | 0.656 (0.033) | -0.056 (-0.194/-0.035) |
| <b>Zebu</b>                 |       |             |       |       |               |               |                        |
| BRH                         | 41    | 7.74 (2.40) | 3.620 | 4.447 | 0.682 (0.017) | 0.699 (0.024) | 0.025 (-0.024/0.047)   |
| GUZ                         | 15    | 5.05 (1.61) | 2.957 | 4.646 | 0.606 (0.029) | 0.643 (0.028) | 0.060 (-0.081/0.119)   |
| GYR                         | 23    | 5.79 (1.65) | 3.143 | 4.008 | 0.607 (0.025) | 0.658 (0.031) | 0.079 (-0.022/0.114)   |
| NEL                         | 28    | 5.53 (1.58) | 2.701 | 4.226 | 0.544 (0.022) | 0.603 (0.028) | 0.100 (0.018/0.144)    |
| SIN                         | 11    | 5.42 (1.77) | 3.179 | 3.627 | 0.651 (0.034) | 0.672 (0.030) | 0.033 (-0.117/0.039)   |
| CUZ                         | 50    | 7.53 (2.06) | 4.279 | 5.514 | 0.713 (0.015) | 0.710 (0.041) | -0.003 (-0.046/0.019)  |
| <b>Overall</b>              |       |             |       |       |               |               |                        |
| Mean                        | 41.15 | 6.78 (1.88) | 3.820 | 4.482 | 0.688 (0.018) | 0.711 (0.025) | 0.033 (-0.033/0.063)   |
